# Supplementary material for: MUC1 Expressions and Its Prognostic Values in US Gastric Cancer Patients
Source: MDPI journal article supplement (doi:10.3390/cancers15040998), 2023-02-04
Supplement: s1 [file s1]

## Supplementary Tables

**Table S1.** Mucin expressions and pathological characteristics of gastric cancer

|                                          | MUC2                 |                      | <i>p</i> | MUC5AC*              |                      | <i>p</i> | MUC6*                |                      | <i>p</i> |
|------------------------------------------|----------------------|----------------------|----------|----------------------|----------------------|----------|----------------------|----------------------|----------|
|                                          | Negative<br>(no= 15) | Positive<br>(no= 55) |          | Negative<br>(no= 17) | Positive<br>(no= 52) |          | Negative<br>(no= 46) | Positive<br>(no= 23) |          |
| Tumor size (cm), mean±SD                 | 3.9±2.4              | 3.6±2.4              | 0.669    | 3.6±2.4              | 3.7±2.4              | 0.886    | 3.7±2.2              | 3.7±2.8              | 0.890    |
| Tumor location, no (%)                   |                      |                      | 0.265    |                      |                      | 0.083    |                      |                      | 0.354    |
| Upper third                              | 6 (40.0)             | 32 (58.2)            |          | 11 (64.7)            | 27 (51.9)            |          | 26 (56.5)            | 12 (52.2)            |          |
| Middle third                             | 3 (20.0)             | 12 (21.8)            |          | 5 (29.4)             | 9 (17.3)             |          | 11 (23.9)            | 3 (13.0)             |          |
| Lower third                              | 6 (40.0)             | 11 (20.0)            |          | 1 (5.9)              | 16 (30.8)            |          | 9 (19.6)             | 8 (34.8)             |          |
| Background intestinal metaplasia, no (%) |                      |                      | 0.130    |                      |                      | 0.732    |                      |                      | 0.606    |
| Absent                                   | 9 (60.0)             | 21 (38.2)            |          | 8 (47.1)             | 22 (42.3)            |          | 21 (45.7)            | 9 (39.1)             |          |
| Present                                  | 6 (40.0)             | 34 (61.8)            |          | 9 (52.9)             | 30 (57.7)            |          | 25 (54.3)            | 14 (60.9)            |          |
| Lauren classification, no (%)            |                      |                      | 0.885    |                      |                      | 0.619    |                      |                      | 0.103    |
| Intestinal type                          | 11 (73.3)            | 35 (63.6)            |          | 12 (70.6)            | 33 (63.5)            |          | 26 (56.5)            | 19 (82.6)            |          |
| Diffuse type                             | 4 (26.7)             | 17 (30.9)            |          | 4 (23.5)             | 17 (32.7)            |          | 17 (37.0)            | 4 (17.4)             |          |
| Mixed type                               | 0 (0)                | 3 (5.5)              |          | 1 (5.9)              | 2 (3.8)              |          | 3 (6.5)              | 0 (0)                |          |
| Tumor depth, no (%)                      |                      |                      | 0.071    |                      |                      | 0.344    |                      |                      | 0.351    |
| Mucosa                                   | 0 (0)                | 11 (20.0)            |          | 1 (5.9)              | 9 (17.3)             |          | 5 (10.9)             | 5 (21.7)             |          |
| Submucosa                                | 5 (33.3)             | 8 (14.5)             |          | 5 (29.4)             | 8 (15.4)             |          | 8 (17.4)             | 5 (21.7)             |          |
| Proper muscle or deeper                  | 10 (66.7)            | 36 (65.5)            |          | 11 (64.7)            | 35 (67.3)            |          | 33 (71.7)            | 13 (56.5)            |          |
| Perineural invasion, no (%)              |                      |                      | 0.796    |                      |                      | 0.732    |                      |                      | 0.482    |
| Absent                                   | 9 (60.0)             | 35 (63.6)            |          | 10 (58.8)            | 33 (63.5)            |          | 30 (65.2)            | 13 (56.5)            |          |
| Present                                  | 6 (40.0)             | 20 (36.4)            |          | 7 (41.2)             | 19 (36.5)            |          | 16 (34.8)            | 10 (43.5)            |          |

|                                 |           |           |       |           |           |           |           |
|---------------------------------|-----------|-----------|-------|-----------|-----------|-----------|-----------|
| Lymphovascular invasion, no (%) |           |           | 0.073 |           | 0.948     |           | 0.495     |
| Absent                          | 4 (26.7)  | 29 (52.7) |       | 8 (47.1)  | 24 (46.2) | 20 (43.5) | 12 (52.2) |
| Present                         | 11 (73.3) | 26 (47.3) |       | 9 (52.9)  | 28 (53.8) | 26 (56.5) | 11 (47.8) |
| Lymph node metastasis, no (%)   |           |           | 0.041 |           | 0.728     |           | 0.395     |
| Absent                          | 4 (26.7)  | 31 (56.4) |       | 9 (52.9)  | 25 (48.1) | 21 (45.7) | 13 (56.5) |
| Present                         | 11 (73.3) | 24 (43.6) |       | 8 (47.1)  | 27 (51.9) | 25 (54.3) | 10 (43.5) |
| Distant metastasis, no (%)      |           |           | 0.109 |           | 0.441     |           | 0.323     |
| Absent                          | 9 (60.0)  | 44 (80.0) |       | 14 (82.4) | 38 (73.1) | 33 (71.7) | 19 (82.6) |
| Present                         | 6 (40.0)  | 11 (20.0) |       | 3 (17.6)  | 14 (26.9) | 13 (28.3) | 4 (17.4)  |
| AJCC TNM stage, no (%)          |           |           | 0.504 |           | 0.943     |           | 0.340     |
| Stage I                         | 4 (26.7)  | 20 (36.4) |       | 5 (29.4)  | 18 (34.6) | 12 (26.1) | 11 (47.8) |
| Stage II                        | 3 (20.0)  | 13 (23.6) |       | 5 (29.4)  | 11 (21.2) | 12 (26.1) | 4 (17.4)  |
| Stage III                       | 2 (13.3)  | 11 (20.0) |       | 3 (17.6)  | 10 (19.2) | 9 (19.6)  | 4 (17.4)  |
| Stage IV                        | 6 (40.0)  | 11 (20.0) |       | 4 (23.5)  | 13 (25.0) | 13 (28.3) | 4 (17.4)  |

Abbreviations: MUC, mucin; SD, standard deviation; AJCC, American Joint Committee on Cancer.

\*One patient did not have results of immunohistochemical stain for MUC5AC and MUC6.

Table S2. MUC1 expression and pathological characteristics of surgically treated gastric cancer without distant metastasis

|                                          | MUC1                 |                      | <i>p</i> |
|------------------------------------------|----------------------|----------------------|----------|
|                                          | Negative<br>(no= 18) | Positive<br>(no= 31) |          |
| Tumor size (cm), mean±SD                 | 3.1±2.0              | 4.4±2.8              | 0.095    |
| Tumor location, no (%)                   |                      |                      |          |
| Upper third                              | 3 (16.7)             | 4 (12.9)             | 0.706    |
| Middle third                             | 6 (33.3)             | 8 (25.8)             |          |
| Lower third                              | 9 (50.0)             | 19 (61.3)            |          |
| Background intestinal metaplasia, no (%) |                      |                      |          |
| Absent                                   | 4 (22.2)             | 15 (48.4)            | 0.070    |
| Present                                  | 14 (77.8)            | 16 (51.6)            |          |
| Lauren classification, no (%)            |                      |                      |          |
| Intestinal type                          | 18 (100)             | 16 (51.6)            | 0.001    |
| Diffuse type                             | 0 (0)                | 12 (38.7)            |          |
| Mixed type                               | 0 (0)                | 3 (9.7)              |          |
| Tumor depth, no (%)                      |                      |                      |          |
| Mucosa                                   | 7 (38.9)             | 2 (6.7)              | 0.002    |
| Submucosa                                | 6 (33.3)             | 5 (16.7)             |          |
| Proper muscle or deeper                  | 5 (27.8)             | 23 (76.7)            |          |
| Perineural invasion, no (%)              |                      |                      |          |
| Absent                                   | 15 (83.3)            | 18 (58.1)            | 0.069    |
| Present                                  | 3 (16.7)             | 13 (41.9)            |          |
| Lymphovascular invasion, no (%)          |                      |                      |          |
| Absent                                   | 12 (66.7)            | 12 (38.7)            | 0.059    |
| Present                                  | 6 (33.3)             | 19 (61.3)            |          |
| Lymph node metastasis, no (%)            |                      |                      |          |
| Absent                                   | 14 (82.4)            | 13 (46.4)            | 0.017    |
| Present                                  | 3 (17.6)             | 15 (53.6)            |          |
| AJCC TNM stage,* no (%)                  |                      |                      |          |
| Stage I                                  | 13 (72.2)            | 7 (22.6)             | 0.002    |
| Stage II                                 | 4 (22.2)             | 12 (38.7)            |          |
| Stage III                                | 1 (5.6)              | 12 (38.7)            |          |

Abbreviations: MUC, mucin; SD, standard deviation; AJCC, American Joint Committee on Cancer.

\*Final pathological cancer stages were classified according to the 7th edition of AJCC TNM staging classification.
